# Supplementary material
Source: PubMed Central journal article supplement (PMC9092285)

Supplementary Figure 1: Total cell numbers and I-Ab<sup>b</sup> expression in spleens from HOD<sup>+</sup>I-Ab<sup>fl/fl</sup>xCre<sup>+</sup> mice.

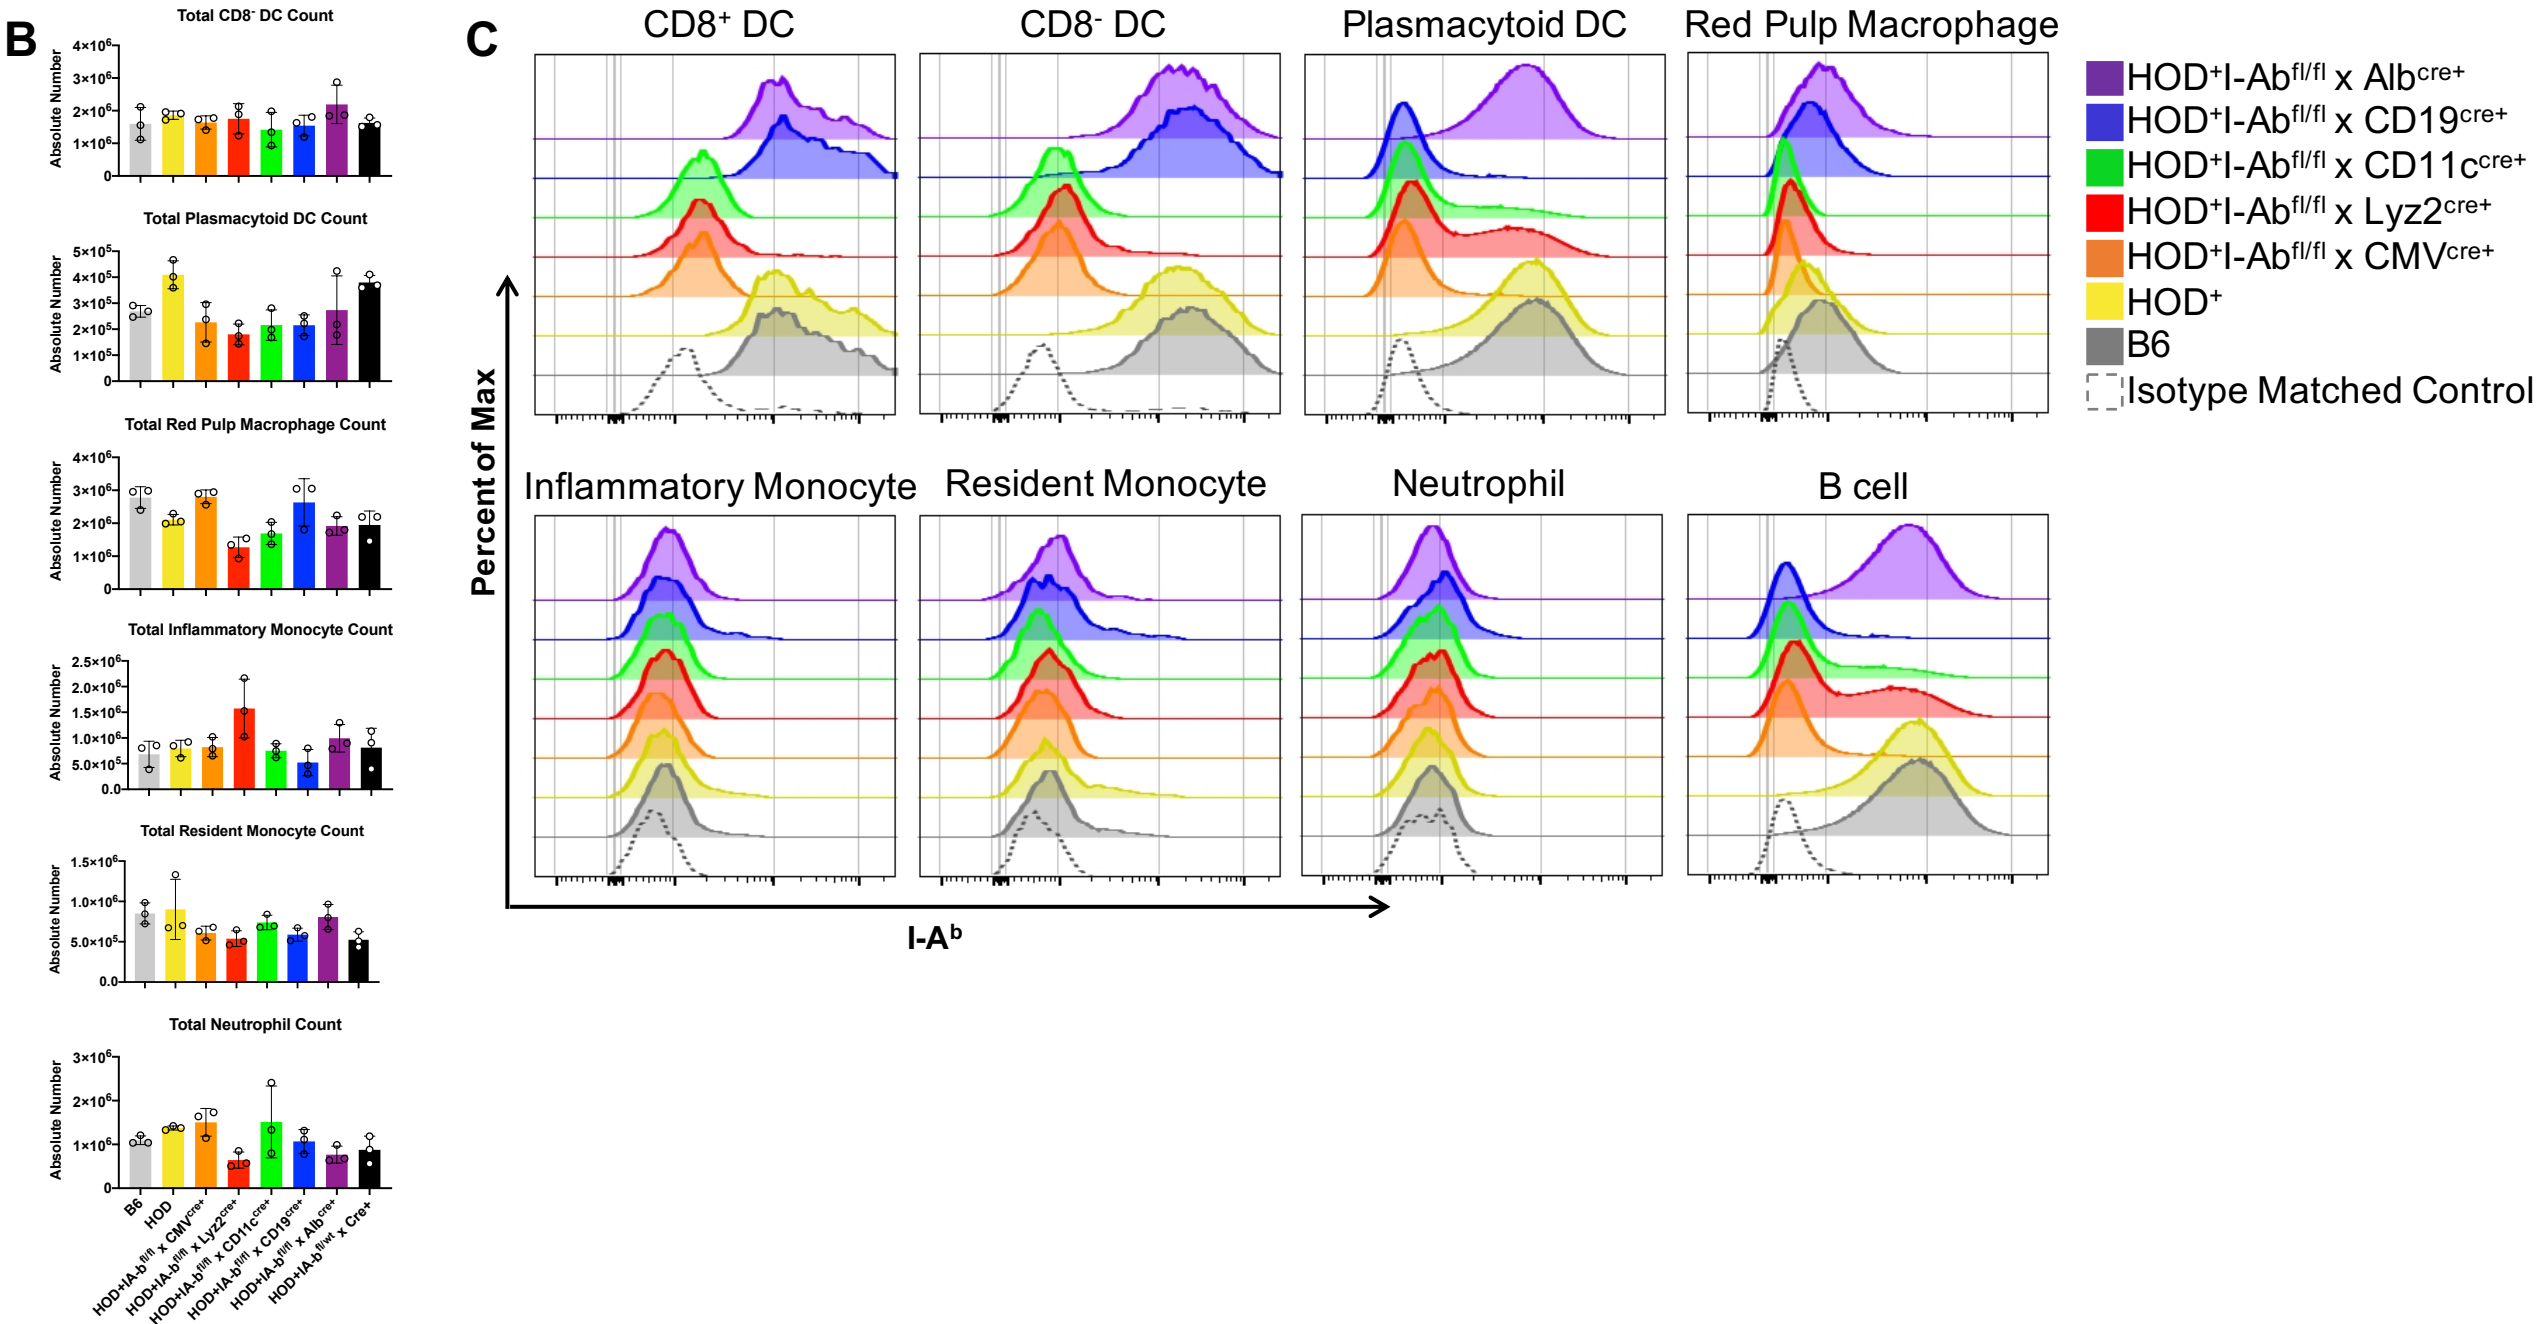

Supplement: NIHMS1783828-supplement-Supplemental_1b-c.pdf [file NIHMS1783828-supplement-Supplemental_1b-c.pdf]
