# Supplementary material
Source: PubMed Central journal article supplement (PMC9092285)

Supplementary Figure 2: Gating strategy for liver leukocytes.

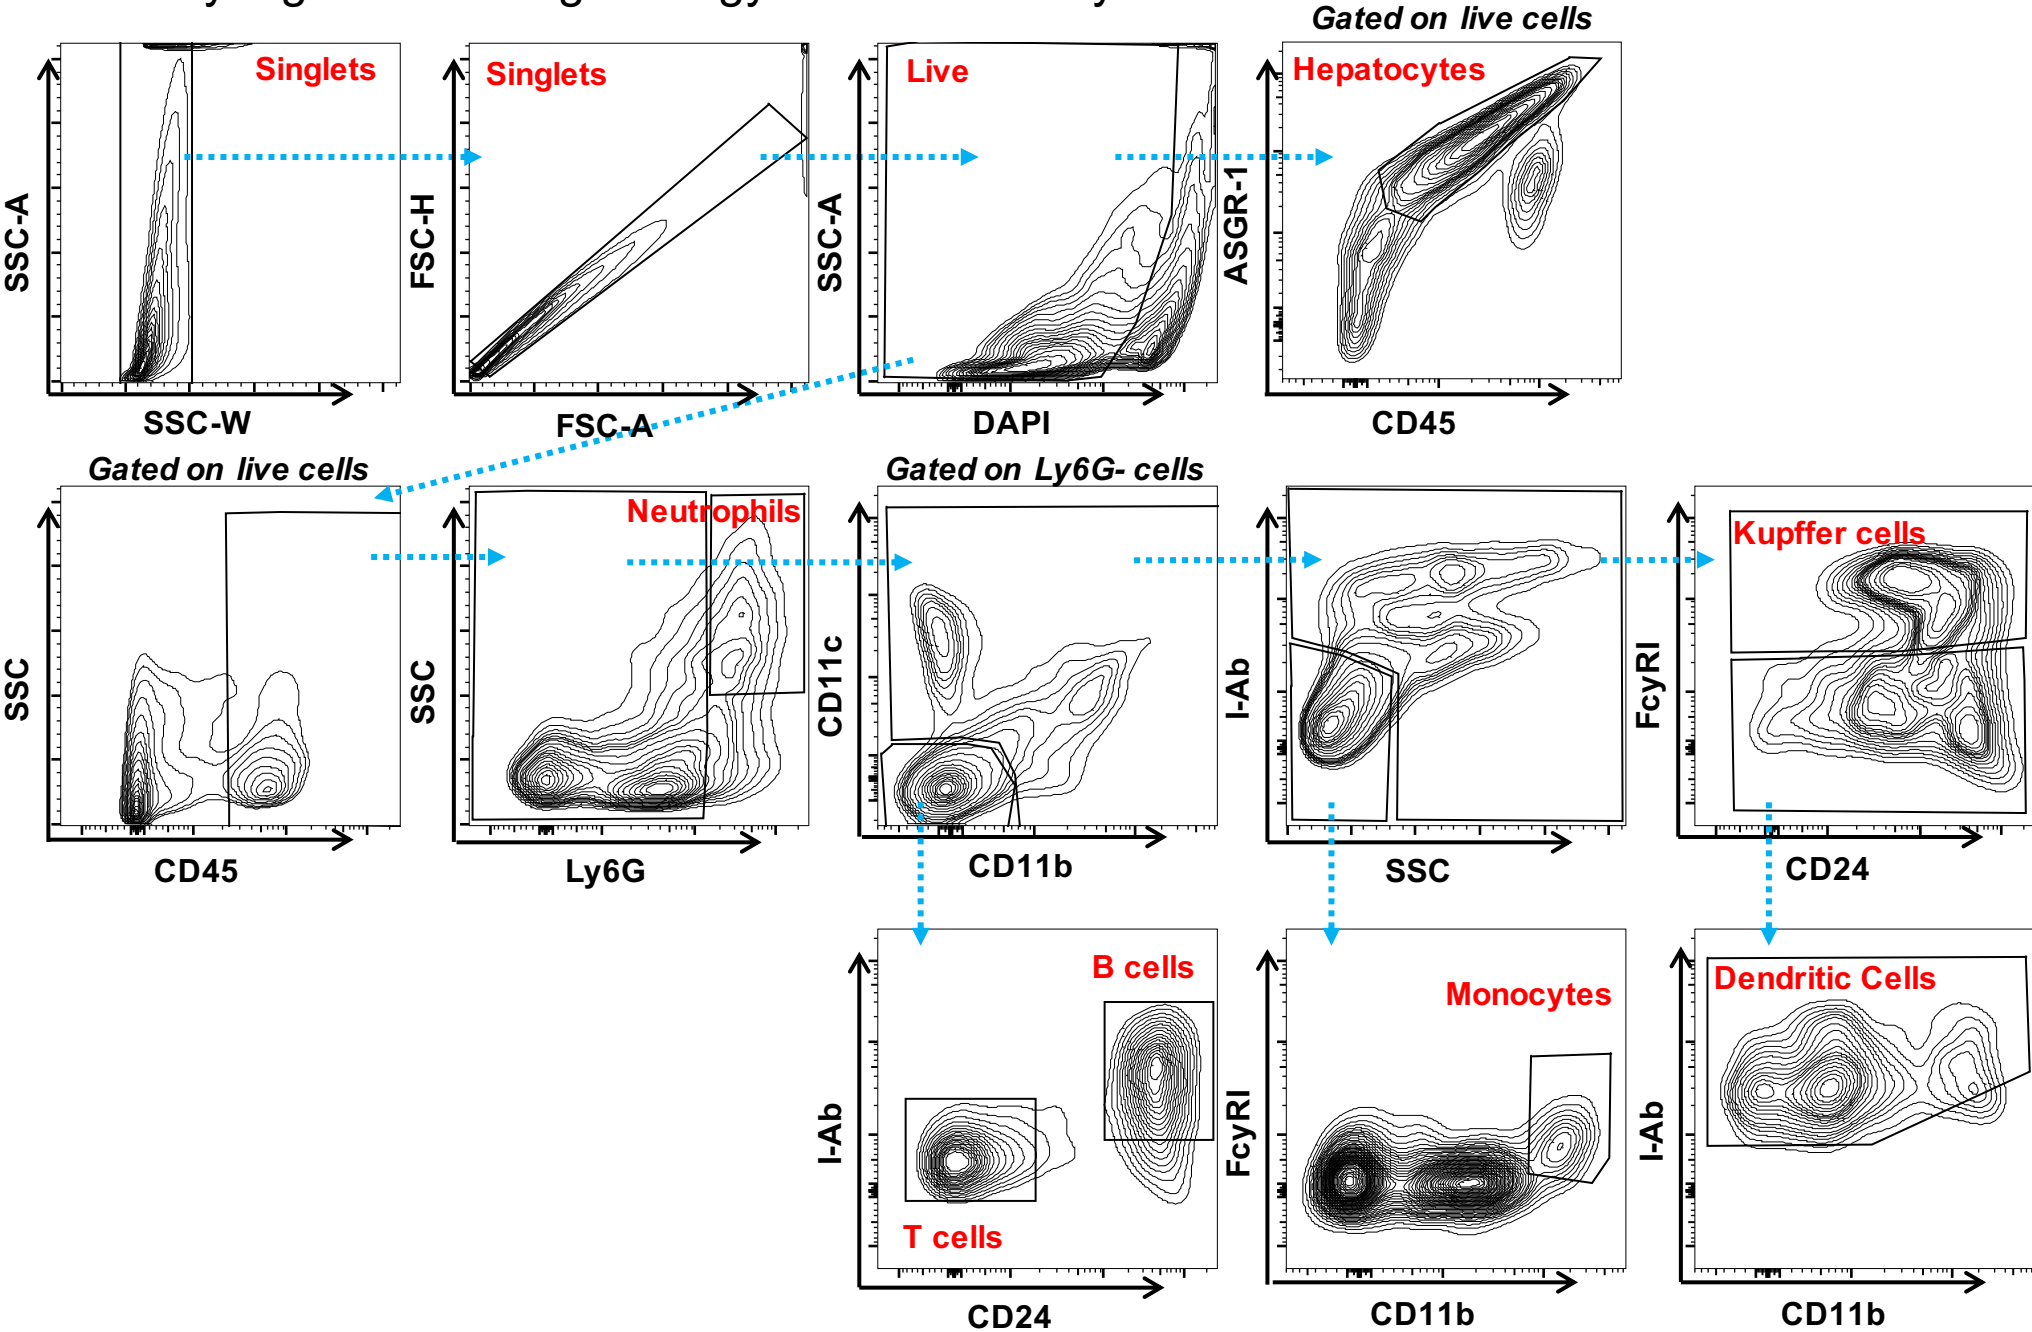

Supplement: NIHMS1783828-supplement-Supplemental_2.pdf [file NIHMS1783828-supplement-Supplemental_2.pdf]
